# Supplementary material
Source: Springer Nature journal article supplement (https://www.springermedizin.de/resource/supplementary/12965_2011_94_MOESM7_ESM.pdf/9573092)

GFP gene standard curve

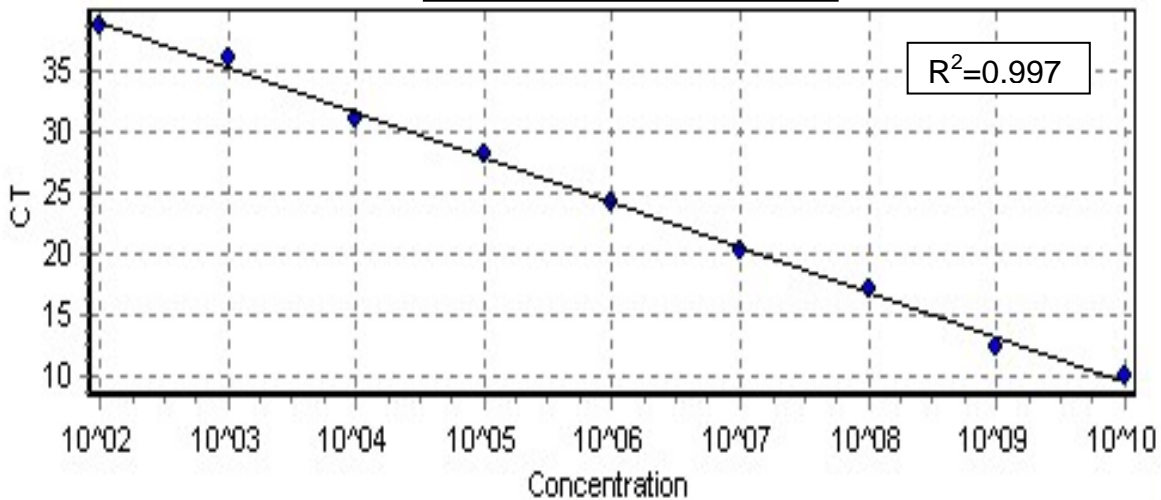

Supplement: MOESM7 [file 9573092]
